# Supplementary material
Source: HighWire-hosted journal article supplement (https://jnm.snmjournals.org/highwire/filestream/94318/field_highwire_adjunct_files/0/97352_Supplemental_Data.pdf)
Supplement: 97352_Supplemental_Data.pdf [file 97352_Supplemental_Data.pdf]

**Supplemental table 1:**

*One-way sensitivity analyses for the cost-effectiveness of MET PET guided surgery of supratentorial high-grade gliomas. ICER = incremental cost effectiveness ratio [€/year], CompOp = Probability of Complete Operability, ComRes = Probability of Complete Resection, survival\_rest = survival after incomplete tumour resection, survival\_no\_rest = survival after complete tumour resection. For each analysis four intervals were chosen. The low and the high value are derived from the parameters illustrated in table 1.*

*Part A represents the calculations according to the baseline scenario whereas part B refers to admissible charge rate scenario.*

**(A) Baseline scenario**

| ComRes | ICER | ComOp | ICER | PET_cost | ICER | survival_rest | ICER | survival_no_rest | ICER   |
|--------|------|-------|------|----------|------|---------------|------|------------------|--------|
| 0.26   | 1854 | 0.4   | 7469 | 829      | 2999 | 0.5           | 2404 | 1.5              | 180640 |
| 0.395  | 2267 | 0.5   | 5975 | 1007     | 3643 | 0.825         | 2818 | 1,875            | 13137  |
| 0.53   | 2919 | 0.6   | 4980 | 1185     | 4287 | 1.15          | 3406 | 2.25             | 6817   |
| 0.665  | 4095 | 0.7   | 4268 | 1363     | 4930 | 1.475         | 4302 | 2.625            | 4602   |
| 0.8    | 6859 | 0.8   | 3735 | 1541     | 5574 | 1.8           | 5838 | 3                | 3474   |

**(B) Admissible charge rate scenario**

| ComOp | ICER  | ComRes | ICER | PET_cost | ICER | survival_rest | ICER | survival_no_rest | ICER   |
|-------|-------|--------|------|----------|------|---------------|------|------------------|--------|
| 0.4   | 10627 | 0.26   | 2637 | 1180     | 4268 | 0.5           | 3420 | 1.5              | 257012 |
| 0.5   | 8502  | 0.395  | 3226 | 1433     | 5184 | 0.825         | 4010 | 1,875            | 18692  |
| 0.6   | 7085  | 0.53   | 4152 | 1686     | 6099 | 1.15          | 4846 | 2.25             | 9699   |
| 0.7   | 6073  | 0.665  | 5826 | 1939     | 7014 | 1.475         | 6121 | 2.625            | 6548   |
| 0.8   | 5314  | 0.8    | 9758 | 2192     | 7929 | 1.8           | 8307 | 3                | 4943   |
